# Supplementary material for: ROR2 homodimerization is sufficient to activate a neuronal Wnt/calcium signaling pathway
Source: PubMed Central journal article supplement (PMC10654037; doi:10.1016/j.jbc.2023.105350), 2023-10-12

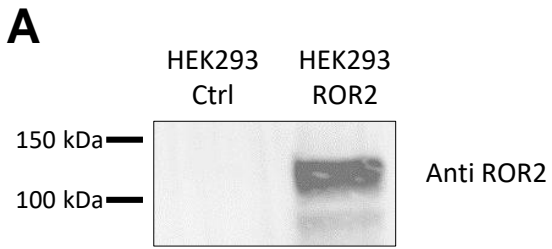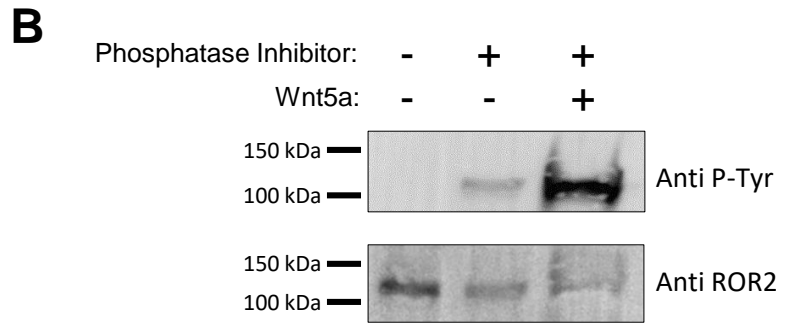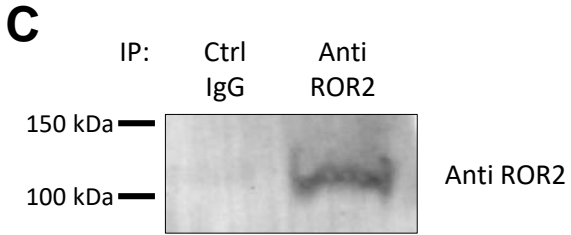

Supplement: mmc1.pdf [file mmc1.pdf]
